# Supplementary material for: Contrasting coordination behavior of Group 12 perchlorate salts with an acyclic N3O2donor ligand by X-ray crystallography and1H NMR
Source: Royal Society of Chemistry journal article supplement (doi:10.1039/c6dt02322c), 2016-01-01
Supplement: c6dt02322c1.pdf [file c6dt02322c1.pdf]

# Contrasting coordination behavior of Group 12 perchlorate salts with an acyclic N<sub>3</sub>O<sub>2</sub> donor ligand by X-ray crystallography and <sup>1</sup>H NMR

Daniel B. Tice, Robert D. Pike, Deborah C. Bebout\*

*Department of Chemistry, The College of William & Mary, Williamsburg, VA 23188*

## ELECTRONIC SUPPLEMENTARY INFORMATION

| Table of Contents with Abbreviated Descriptions                                                                                                     | Page |
|-----------------------------------------------------------------------------------------------------------------------------------------------------|------|
| <b>Table S1.</b> Hydrogen bonding for [Zn( <b>L1</b> )(OH <sub>2</sub> )](ClO <sub>4</sub> ) <sub>2</sub> ( <b>1</b> )                              | S2   |
| <b>Table S2.</b> Hydrogen bonding for [Cd( <b>L1</b> )(OH <sub>2</sub> )(ClO <sub>4</sub> )](ClO <sub>4</sub> ) ( <b>2</b> )                        | S2   |
| <b>Figure S1.</b> Infrared spectra of crystalline <b>1</b> – <b>4</b> and [Hg( <b>L1</b> )(ClO <sub>4</sub> ) <sub>2</sub> ] precipitate            | S3   |
| <b>Figure S2.</b> Powder diffraction of crystalline [Zn( <b>L1</b> )(OH <sub>2</sub> )](ClO <sub>4</sub> ) <sub>2</sub> ( <b>1</b> )                | S4   |
| <b>Figure S3.</b> Powder diffraction of crystalline [Cd( <b>L1</b> )(OH <sub>2</sub> )(OCIO <sub>3</sub> )](ClO <sub>4</sub> ) ( <b>2</b> )         | S4   |
| <b>Figure S4.</b> Powder diffraction of crystalline [Hg( <b>L1</b> )(κ <sup>2</sup> -ClO <sub>4</sub> ) <sub>2</sub> ] <sub>2</sub> ( <b>3</b> )    | S5   |
| <b>Figure S5.</b> Powder diffraction of crystalline [Hg( <b>L1</b> )(κ <sup>2</sup> -ClO <sub>4</sub> )(OCIO <sub>3</sub> )] ( <b>4</b> )           | S5   |
| <b>Figure S6.</b> Phase assessment of precipitated [Cd( <b>L1</b> )(ClO <sub>4</sub> )](ClO <sub>4</sub> ) by PXRD                                  | S6   |
| <b>Figure S7.</b> Phase assessment of precipitated [Hg( <b>L1</b> )(ClO <sub>4</sub> ) <sub>2</sub> ] by PXRD                                       | S7   |
| <b>Figure S8.</b> Tricapped trigonal prismatic Hg(II) coordination geometry of <b>3</b>                                                             | S8   |
| <b>Figure S9.</b> Distorted square antiprism coordination geometry of <b>4</b>                                                                      | S9   |
| <b>Figure S10.</b> Views of <b>1</b> – <b>4</b> highlighting exposure of H <sub>a</sub> to shielding ring currents                                  | S10  |
| <b>Figure S11.</b> δ <sub>H</sub> as a function of [Zn(ClO <sub>4</sub> ) <sub>2</sub> ·6H <sub>2</sub> O]/[ <b>L</b> ] at -40 °C and 20 °C         | S11  |
| <b>Figure S12.</b> δ <sub>H</sub> vs. nominal [Cd(ClO <sub>4</sub> ) <sub>2</sub> ·6H <sub>2</sub> O]/[ <b>L1</b> ] at -40 °C in CD <sub>3</sub> CN | S12  |

**Table S1.** Hydrogen bonds for [Zn(**L1**)(OH<sub>2</sub>)](ClO<sub>4</sub>)<sub>2</sub> (**1**) [Å and °].

| D-H...A               | d(D-H)  | d(H...A) | d(D...A) | <(DHA) |
|-----------------------|---------|----------|----------|--------|
| O(1W)-H(1W)...O(3)#1  | 0.71(3) | 2.57(3)  | 3.148(2) | 140(3) |
| O(1W)-H(1W)...O(4)#1  | 0.71(3) | 2.17(3)  | 2.848(3) | 162(3) |
| O(1W)-H(2W)...O(10)#1 | 0.88(3) | 1.84(3)  | 2.715(2) | 162(3) |

Symmetry transformations used to generate equivalent atoms: #1 x-1/2,-y+1/2,z-1/2

**Table S2.** Hydrogen bonds for [Cd(**L1**)(OH<sub>2</sub>)(ClO<sub>4</sub>)](ClO<sub>4</sub>) (**2**) [Å and °].

| D-H...A              | d(D-H)  | d(H...A) | d(D...A) | <(DHA) |
|----------------------|---------|----------|----------|--------|
| O(1W)-H(1W)...O(7)#1 | 0.76(3) | 2.02(3)  | 2.750(3) | 160(3) |
| O(1W)-H(2W)...O(8)   | 0.76(3) | 2.04(3)  | 2.801(3) | 175(3) |

Symmetry transformations used to generate equivalent atoms: #1 x-1/2,y,-z+1/2

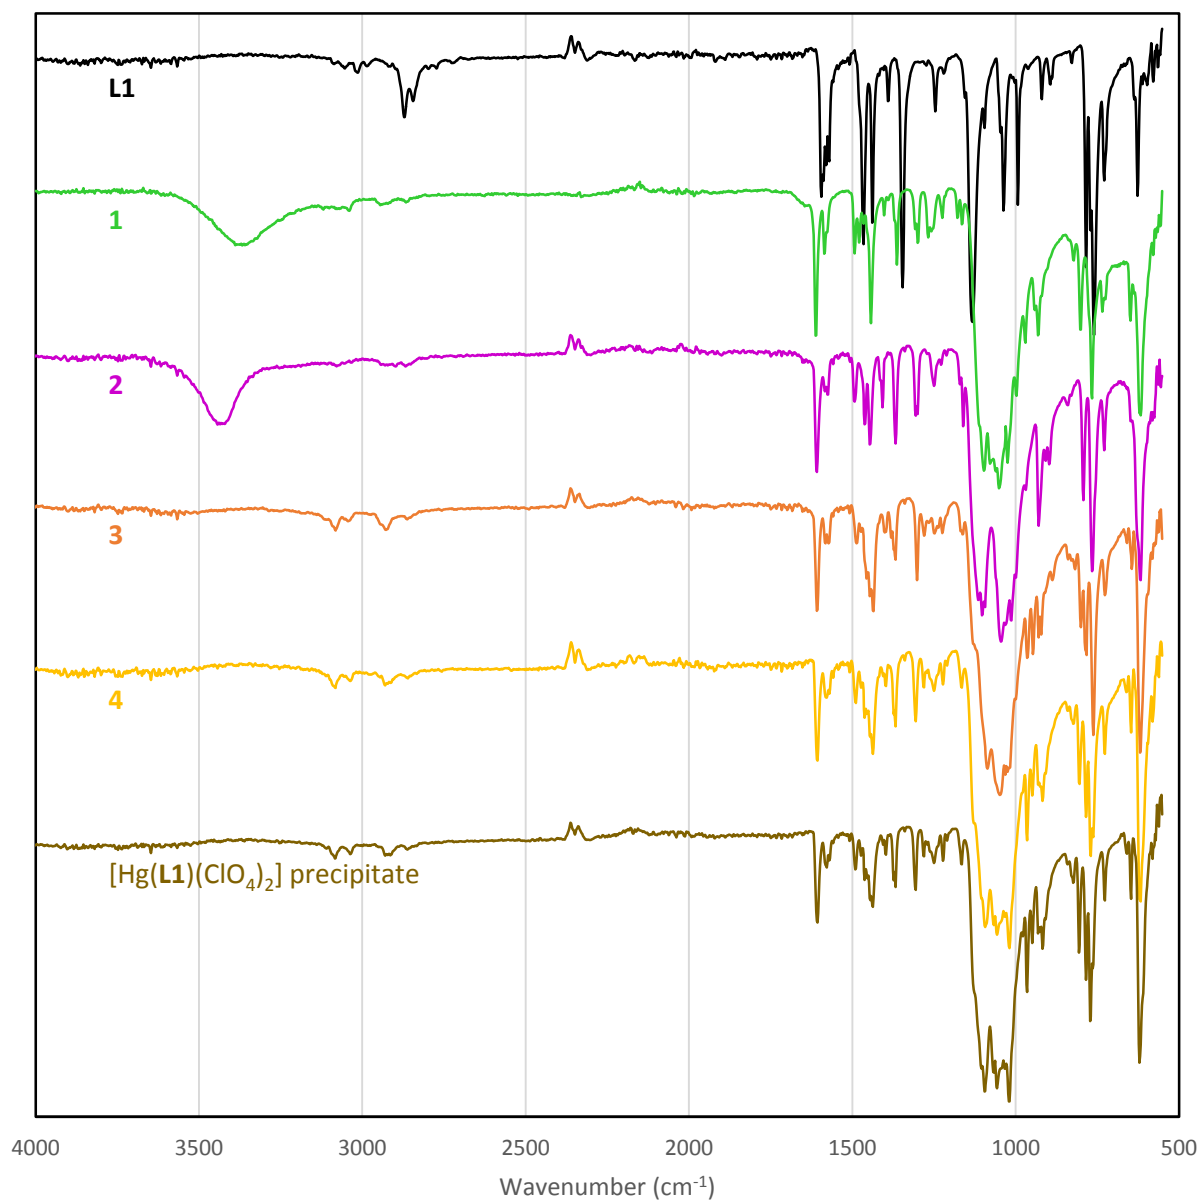

**Figure 1.** FTIR spectra of crystalline  $[\text{Zn}(\mathbf{L1})(\text{OH}_2)](\text{ClO}_4)_2$  (**1**),  $[\text{Cd}(\mathbf{L1})(\text{OH}_2)(\text{OCIO}_3)](\text{ClO}_4)$  (**2**),  $[\text{Hg}(\mathbf{L1})(\kappa^2\text{-ClO}_4)_2]$  (**3**),  $[\text{Hg}(\mathbf{L1})(\kappa^2\text{-ClO}_4)(\text{OCIO}_3)]_2$  (**4**) and  $[\text{Hg}(\mathbf{L1})(\text{ClO}_4)_2]$  precipitated from acetonitrile/m-xylene.

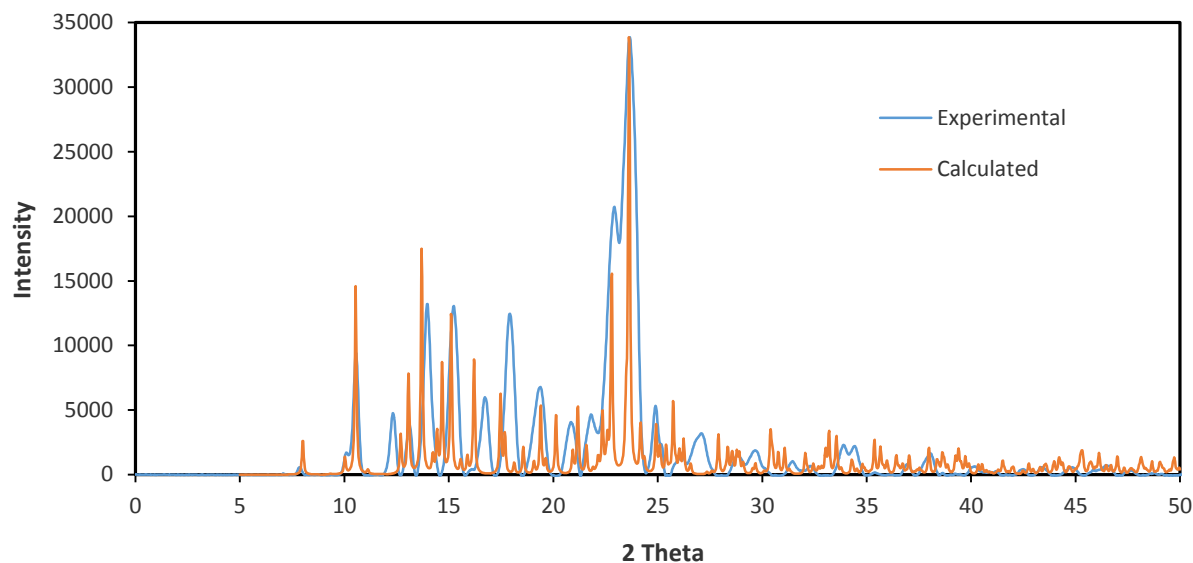

**Figure S2.** Powder diffraction analysis of crystalline  $[\text{Zn}(\mathbf{L1})(\text{OH}_2)](\text{ClO}_4)_4$  (**1**). Experimental data (blue) for the bulk crystalline material prepared by slow evaporation from an acetonitrile/mesitylene solution containing stoichiometrically equivalent amounts of **L1** and  $\text{Zn}(\text{ClO}_4)_2$  compared to the calculated (Mercury 3.3) powder pattern for **1** (orange). Experimental  $2\theta$  peaks  $11.66^\circ$ ,  $11.88^\circ$ ,  $13.64^\circ$ , and  $13.78^\circ$  poorly accounted for by experimental data

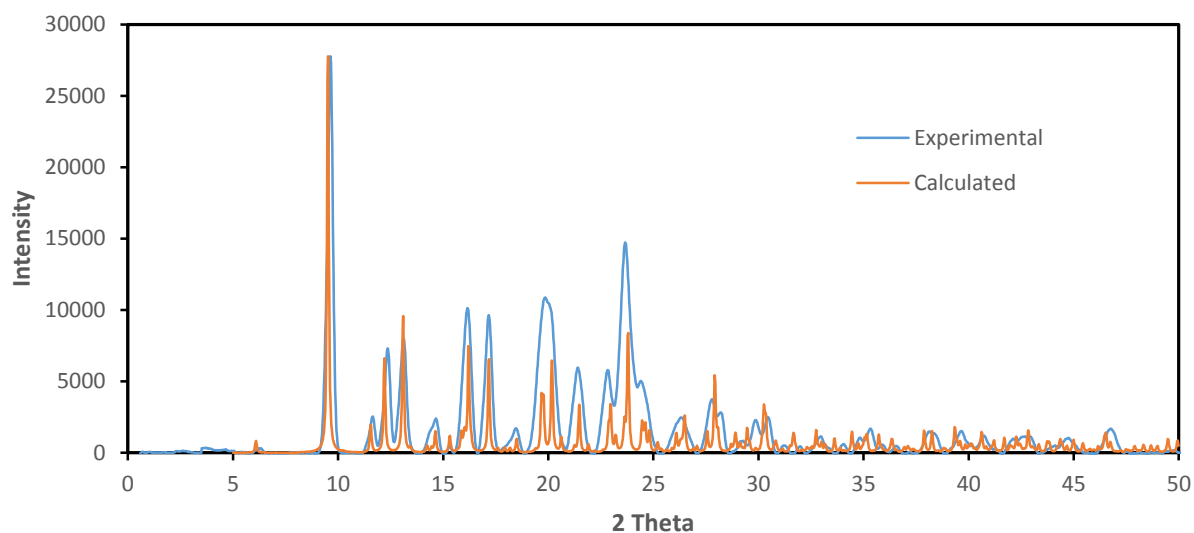

**Figure S3.** Powder diffraction analysis of crystalline  $[\text{Cd}(\mathbf{L1})(\text{OH}_2)(\text{OClO}_3)](\text{ClO}_4)$  (**2**). Experimental data (blue) for the crystalline material prepared by slow evaporation of an acetonitrile/m-xylene solution containing stoichiometrically equivalent amounts of **L1** and  $\text{Cd}(\text{ClO}_4)_2$  is compared to the calculated (Mercury 3.3) powder pattern for **2** (orange).

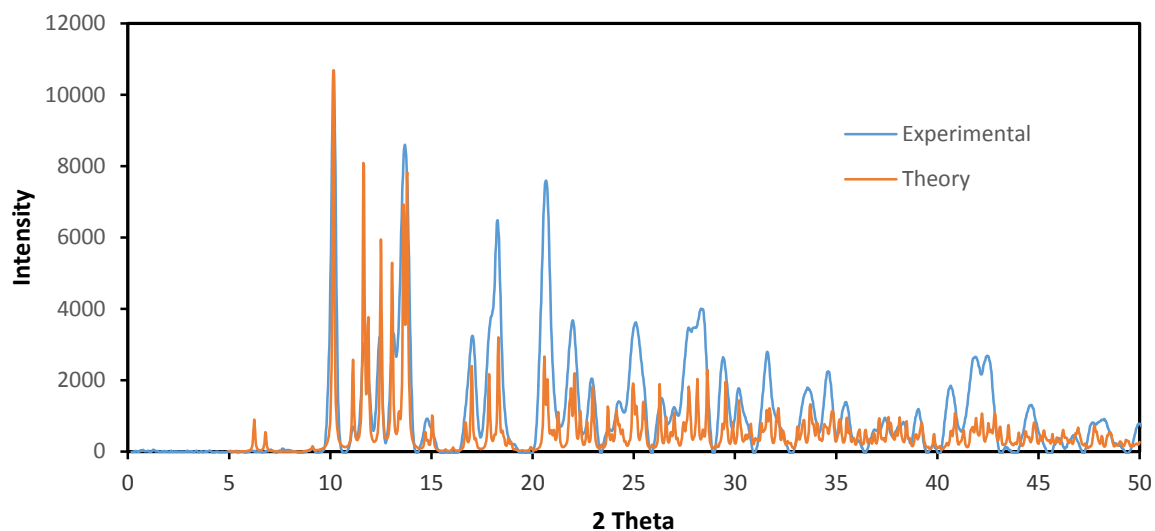

**Figure S4.** Powder diffraction analysis of crystalline  $[\text{Hg}(\mathbf{L1})(\kappa^2\text{-ClO}_4)_2]$  (**3**). Experimental data (blue) for the crystalline material prepared by slow evaporation of an acetonitrile/m-xylene solution containing stoichiometrically equivalent amounts of **L1** and  $\text{Hg}(\text{ClO}_4)_2$  compared to the calculated (Mercury 3.3) powder pattern for **3** (orange).

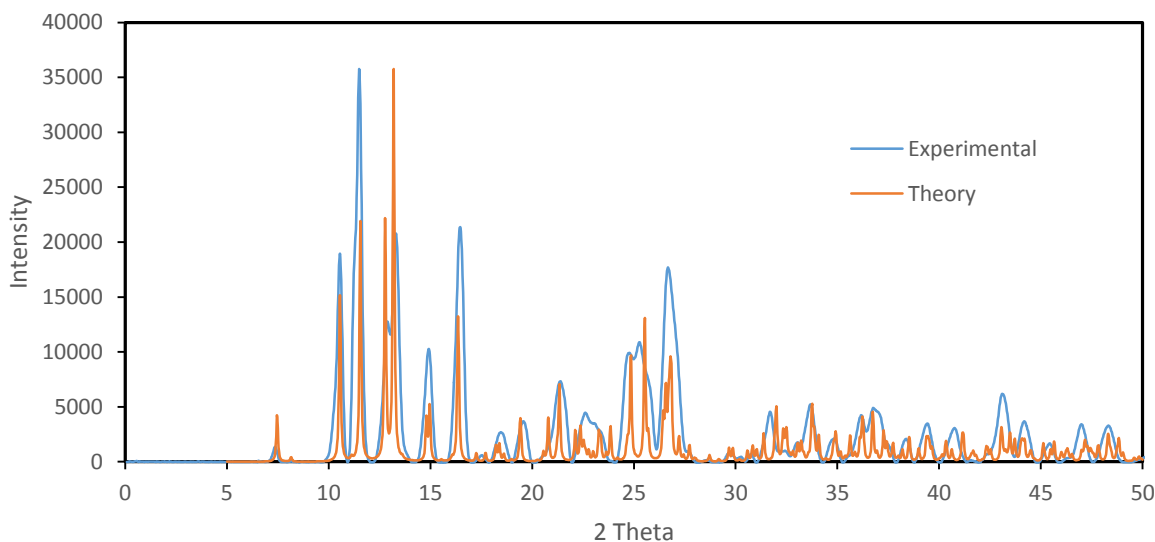

**Figure S5.** Powder diffraction analysis of crystalline  $[\text{Hg}(\mathbf{L1})(\kappa^2\text{-ClO}_4)(\text{OCIO}_3)]$  (**4**). Experimental data (blue) for **4** prepared by slow evaporation of an acetone solution containing stoichiometrically equivalent amounts of **L1** and  $\text{Hg}(\text{ClO}_4)_2$  compared to the calculated (Mercury 3.3) powder pattern for **4** (orange).

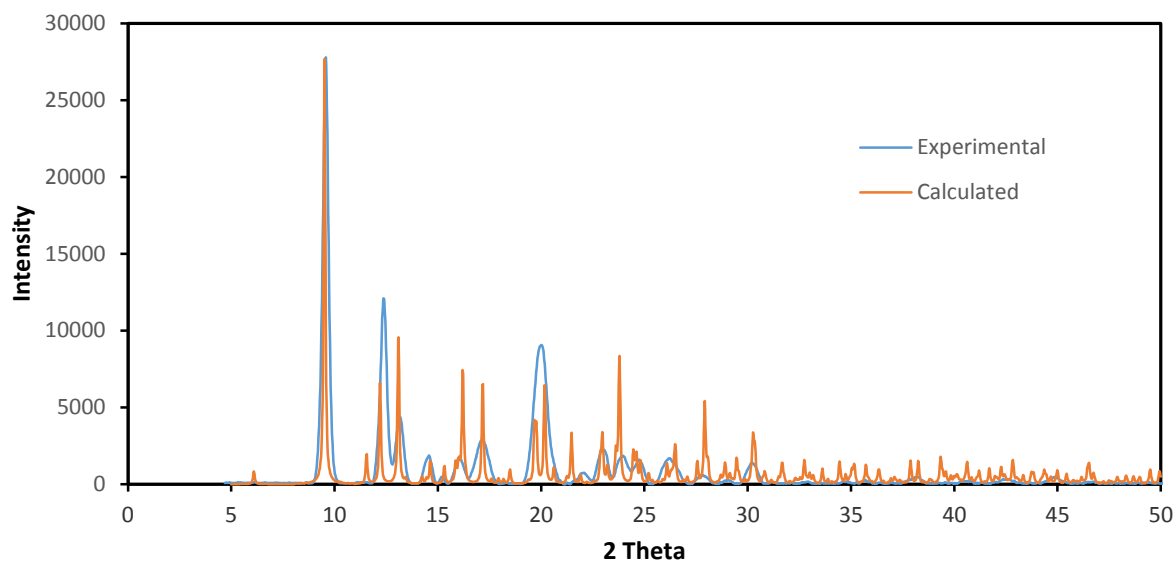

**Figure S6.** Powder diffraction analysis of precipitated  $[\text{Cd}(\mathbf{L1})(\text{OH}_2)(\text{OCIO}_3)](\text{ClO}_4)$  (**2**). Experimental data (blue) for the precipitate isolated following addition of m-xylene to a room temperature acetonitrile solution containing stoichiometrically equivalent amounts of **L1** and  $\text{Cd}(\text{ClO}_4)_2$  compared to the calculated (Mercury 3.3) powder pattern for **2** (orange).

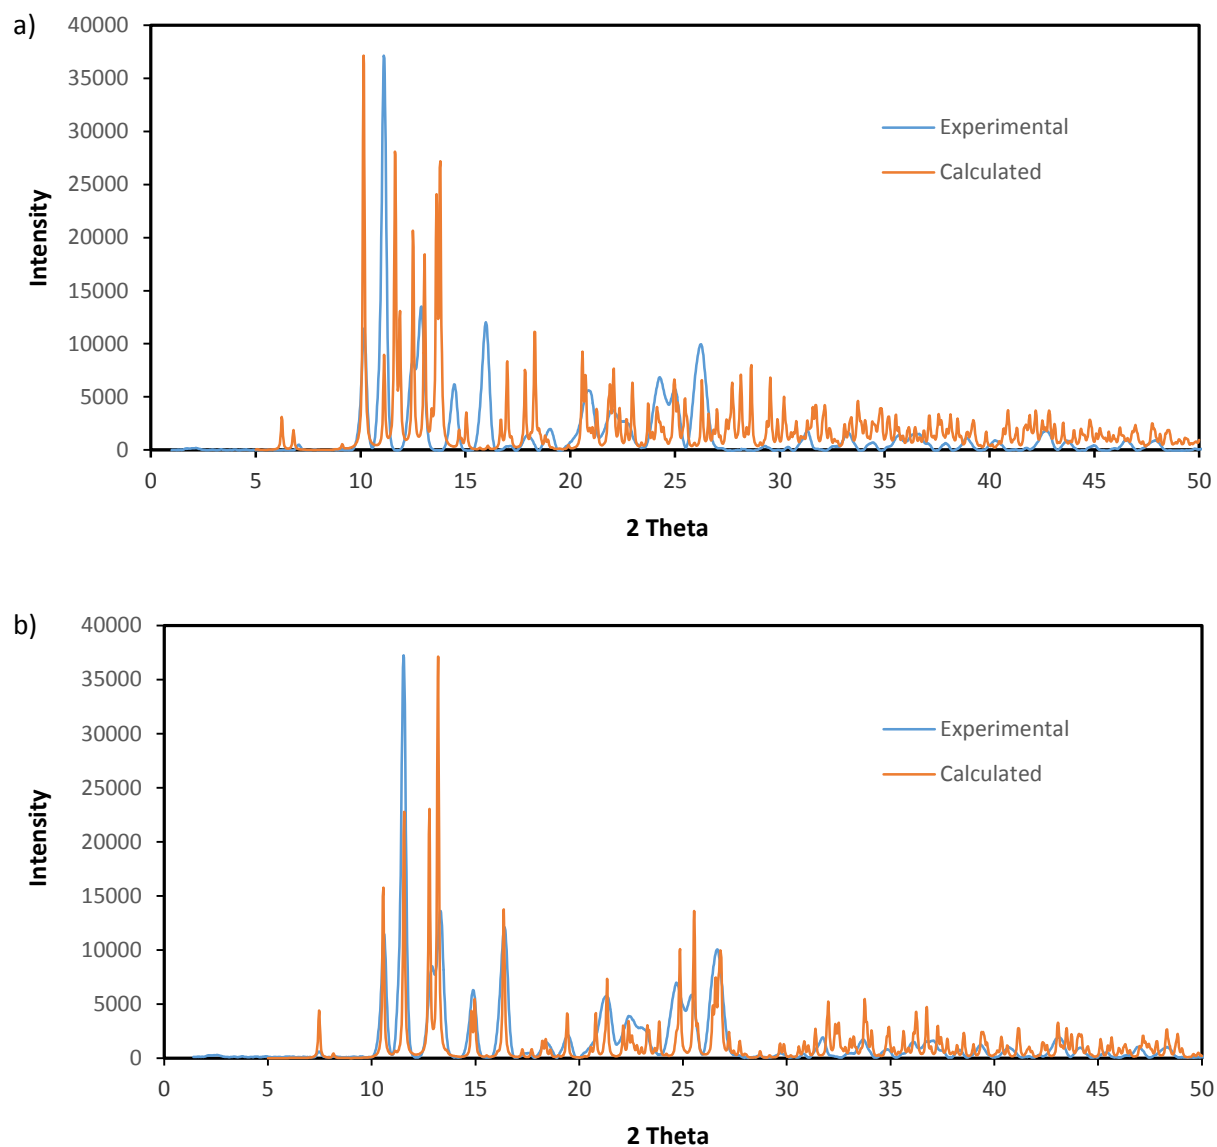

**Figure S7.** Powder diffraction analysis of precipitated  $[\text{Hg}(\mathbf{L1})(\text{ClO}_4)_2]$ . Experimental data (blue) for the precipitate isolated following addition of m-xylene to a room temperature acetonitrile solution containing stoichiometrically equivalent amounts of  $\mathbf{L1}$  and  $\text{Hg}(\text{ClO}_4)_2$  is compared to the calculated (orange, Mercury 3.3) powder pattern for a) **3** with calculated  $2\theta$  peaks at  $11.66$ ,  $11.88$ ,  $13.64$ , and  $13.78^\circ$  poorly accounted for by experimental data and b) **4** with all calculated  $2\theta$  peaks reasonably well matched.

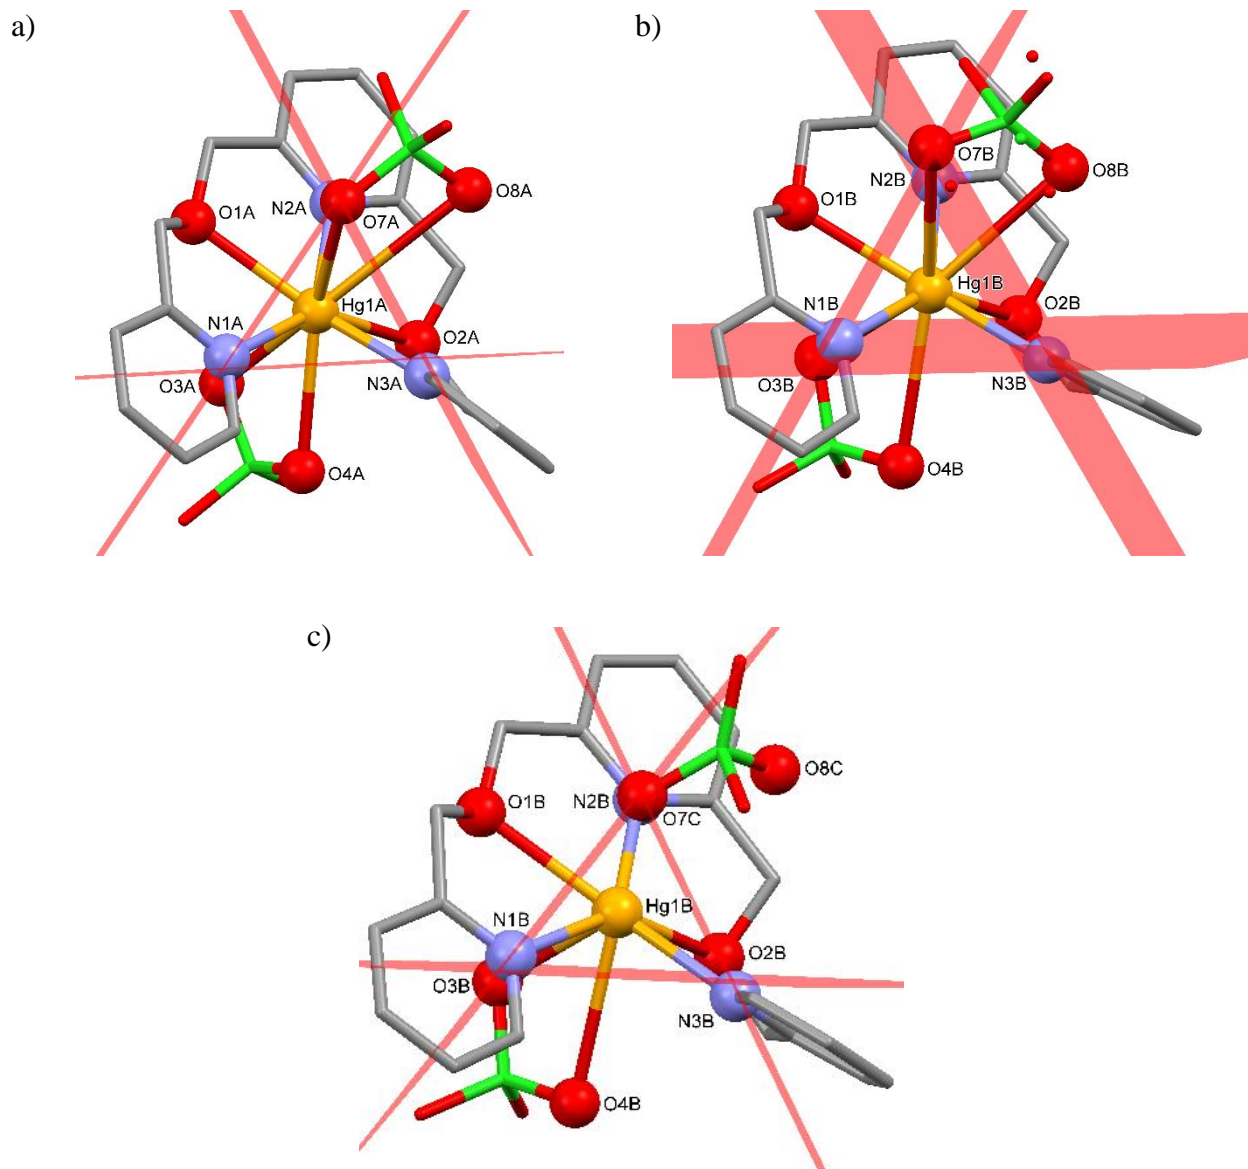

**Figure S8.** Overview of tricapped trigonal prismatic Hg(II) coordination geometry found in the independent molecules of **3** viewed down the pseudo three fold axis. a) Ordered Hg1A molecule. The angles between the square planes highlighted are  $52.84^\circ$ ,  $62.28^\circ$  and  $64.88^\circ$ . The angle between the triangular planes is  $11.37^\circ$ . b) Hg1B with the Cl2B perchlorate position. The angles between the rectangular planes are  $58.35^\circ$ ,  $60.00^\circ$  and  $62.17^\circ$ . The angle between the triangular planes is  $11.37^\circ$ . c) Square planes associated with the square antiprism coordination geometry of Hg1B with the Cl2C perchlorate position (Hg1B-O7C and Hg1B-O8c bonds not shown). The angles between the square planes highlighted are  $53.83^\circ$ ,  $61.75^\circ$  and  $64.46^\circ$ . The angle between the triangular planes is  $10.88^\circ$ .

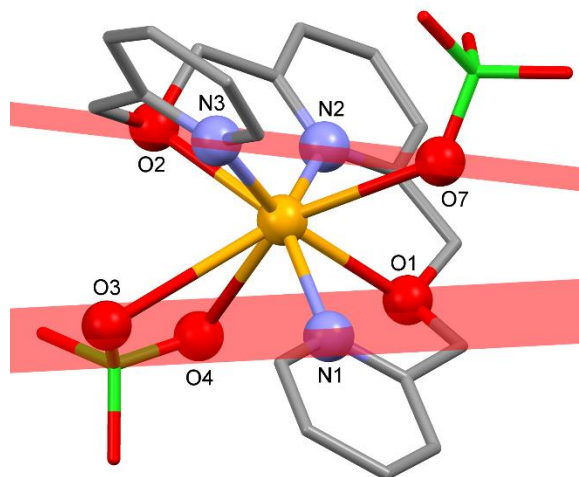

**Figure S9.** Overview of the square planes associated with the distorted square antiprism coordination geometry of **4**. The angle between the N2-N3-O2-O7 (rmsd 0.024) and N1-O1-O3-O4 (rmsd 0.17) planes is 10.07(13)°. Tethering constraints of the pentadentate ligand can account for both displacement of O1 from the N1-O1-O3-O4 ligand plane and tilting of this plane towards the other. The closely related dodecahedral coordination geometry would be expected to have these two square faces undergo orthogonal puckering towards two triangles.

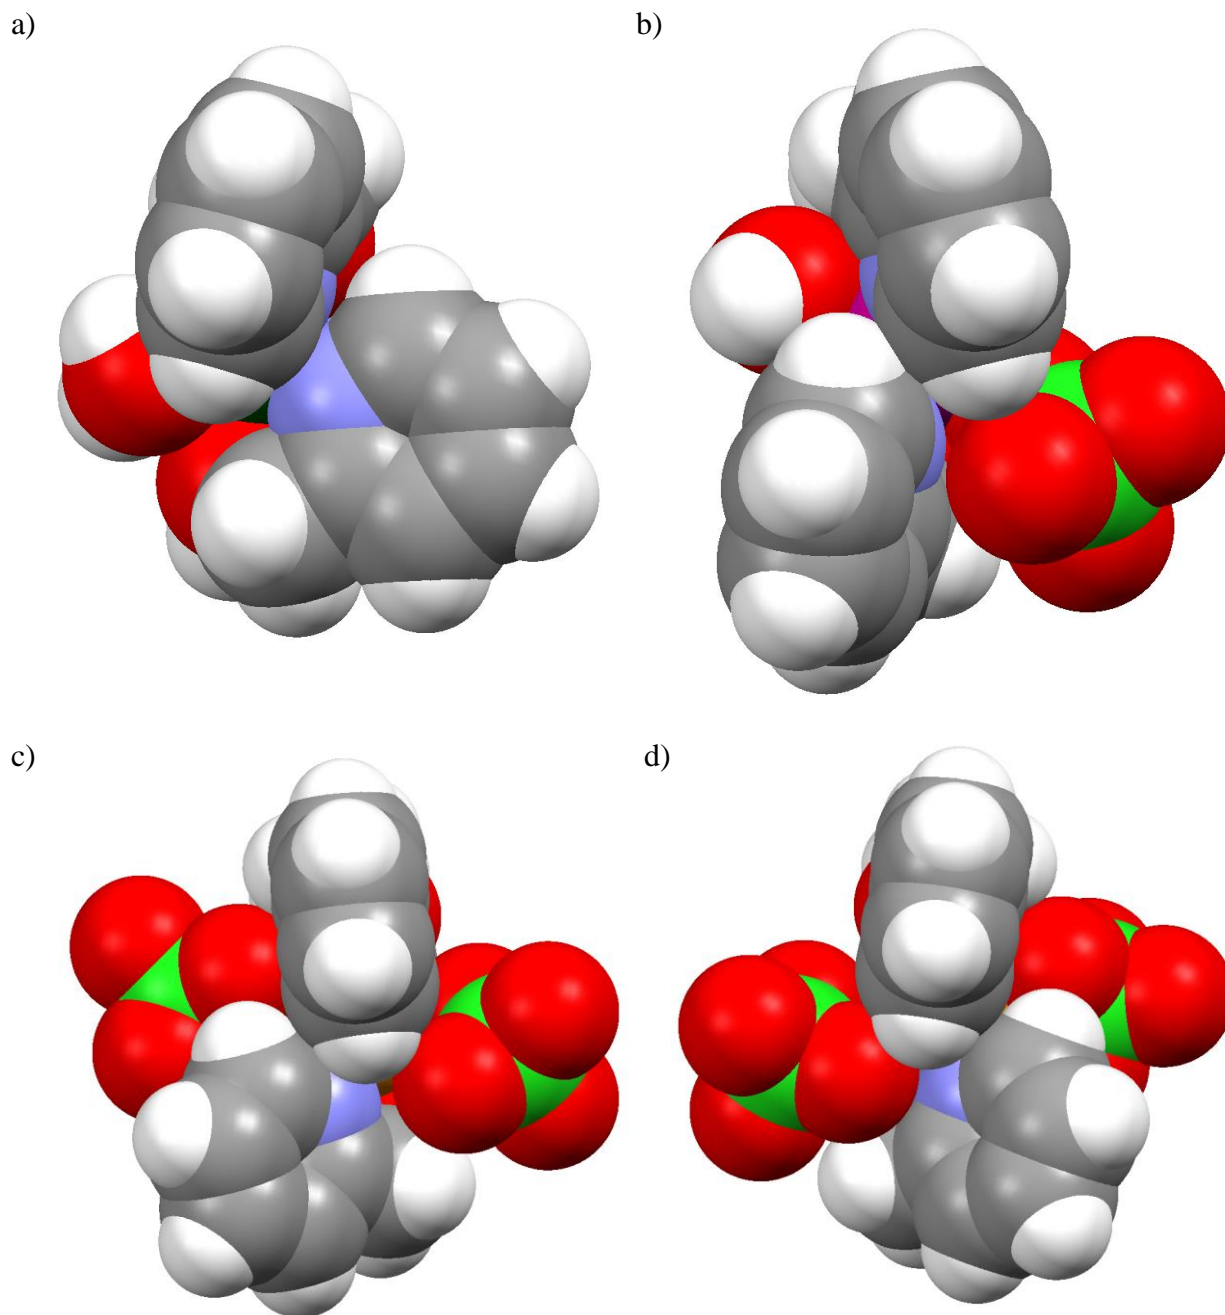

**Figure S10.** Spacefill views of  $[\text{Zn}(\text{L1})(\text{OH}_2)]^{2+}$  (cation of **1**),  $[\text{Cd}(\text{L1})(\text{OH}_2)(\text{OCIO}_3)]^+$  (cation of **2**), **3** (one independent molecule) and **4** with the N2 pyridyl ring oriented approximately perpendicular to the page to highlight the conformational exposure of  $H_a$  to the shielding ring current of one of the other pyridyl rings.

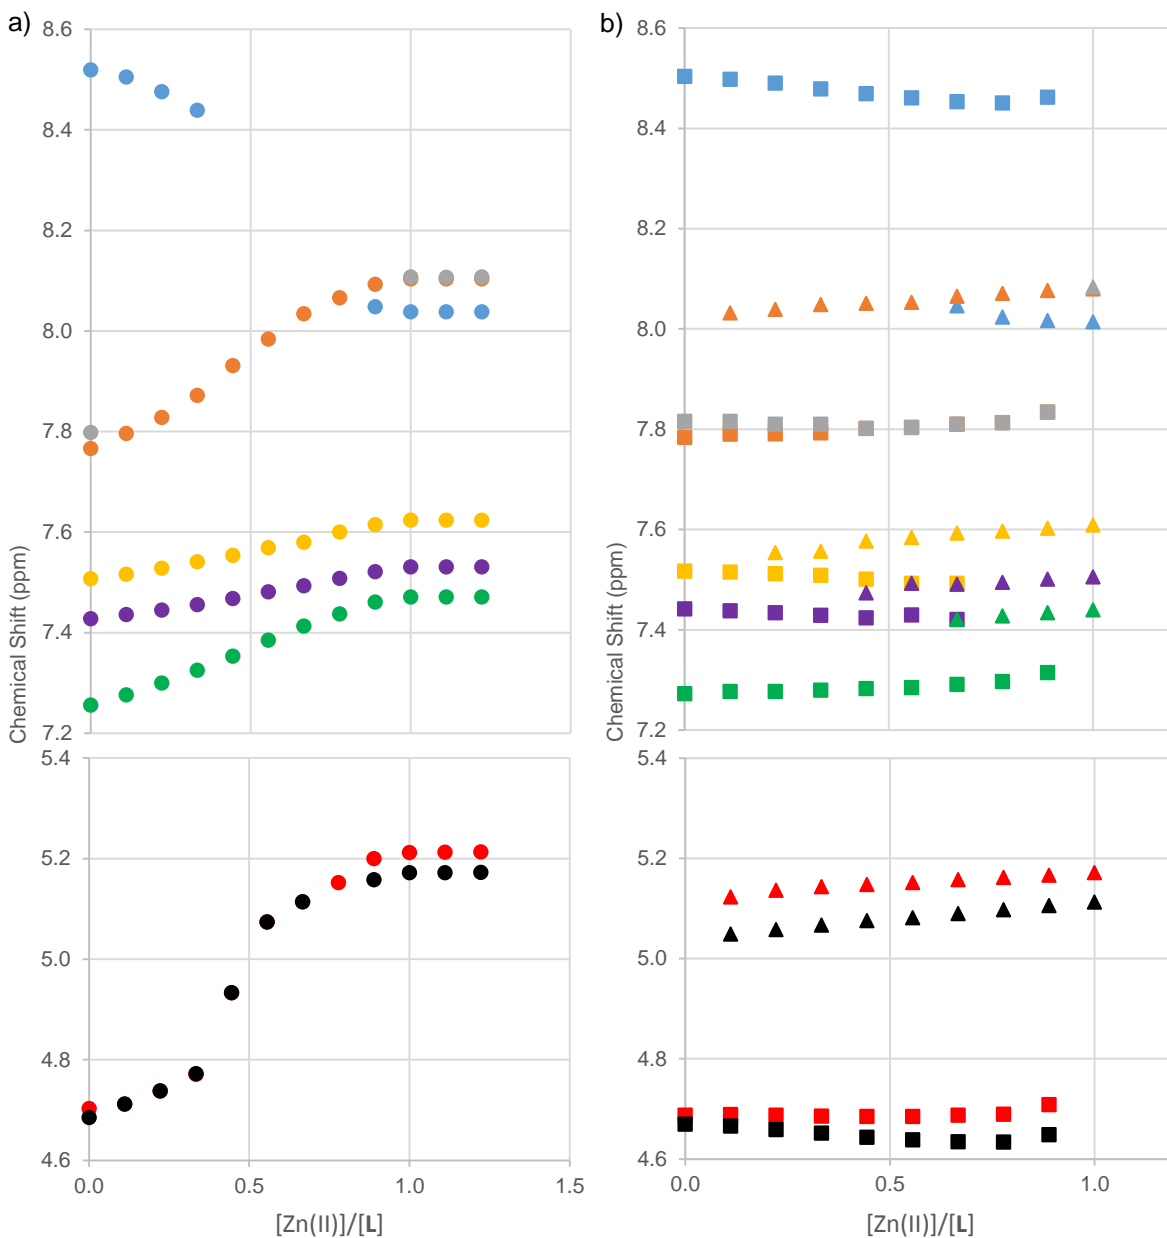

**Figure S11.** Plots of  $\delta_H$  as a function of nominal  $[\text{Zn}(\text{ClO}_4)_2 \cdot 6\text{H}_2\text{O}]/[\text{L1}]$  with color coded proton assignments  $\text{H}_a$ ,  $\text{H}_b$ ,  $\text{H}_c$ ,  $\text{H}_d$ ,  $\text{H}_e$ ,  $\text{H}_f$ ,  $\text{H}_g$  and  $\text{H}_h$  at a) 20 °C and b) -40 °C. Squares are for exchange averaged  $\delta_H$  closely associated with free **L1**. Triangles are for exchange averaged  $\delta_H$  closely associated with  $[\text{M}(\text{L1})]^{2+}$ . In some spectra,  $\text{H}_c$  and  $\text{H}_h$  were indistinguishable.

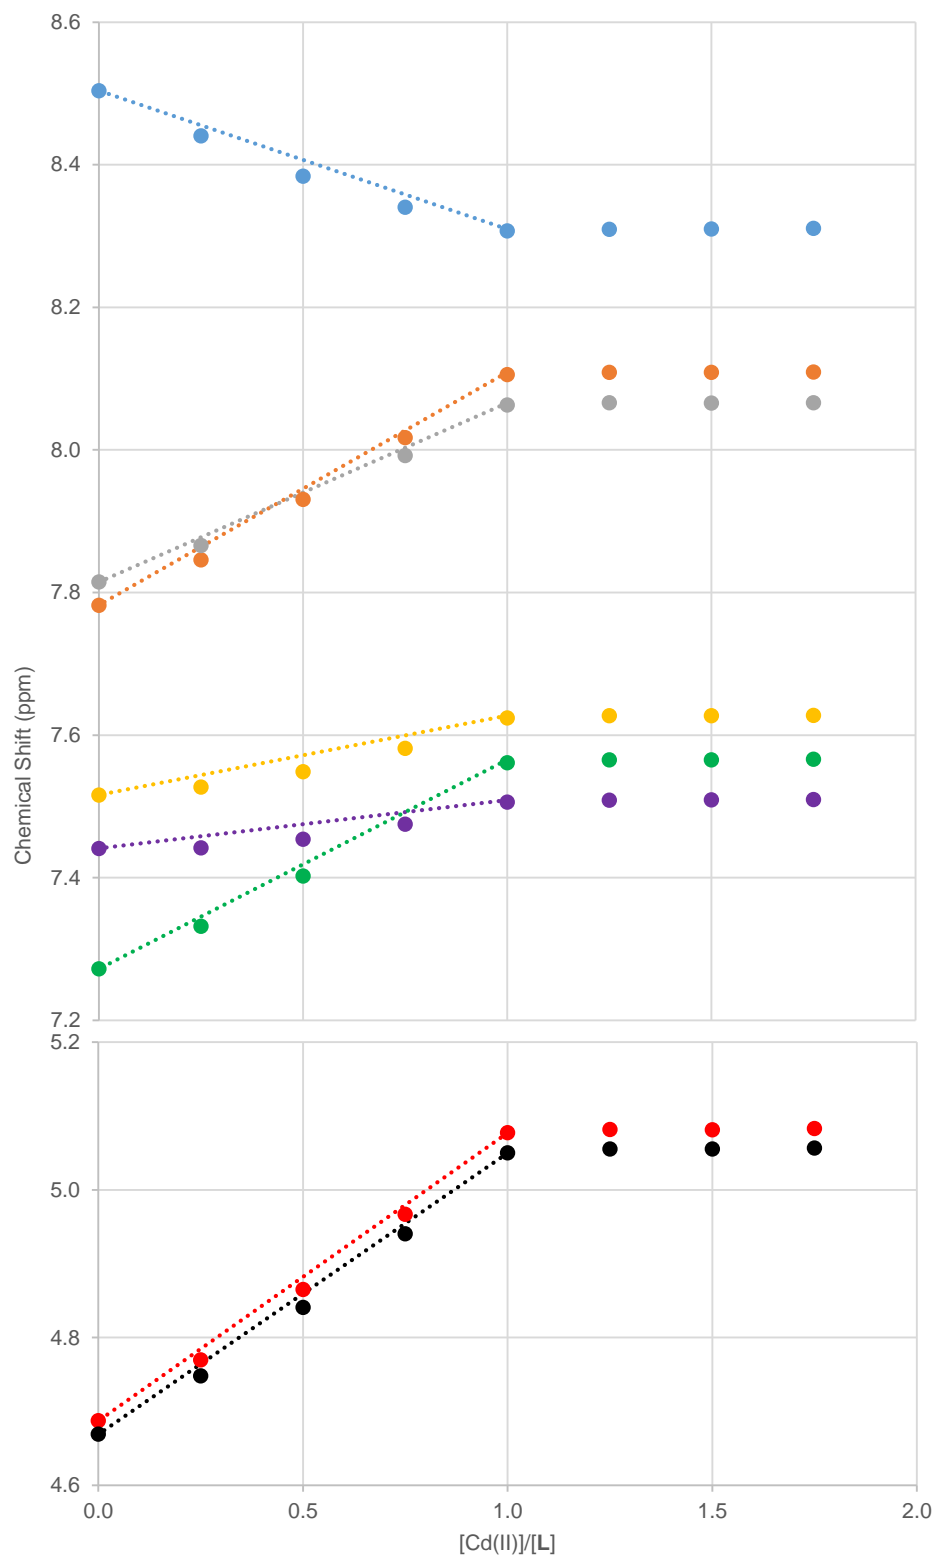

**Figure S12.** Plots of  $\delta_H$  as a function of nominal  $[Cd(ClO_4)_2 \cdot 6H_2O]/[L1]$  at  $-40\text{ }^\circ\text{C}$  in  $CD_3CN$ . Color code for proton assignments:  $H_a$ ,  $H_b$ ,  $H_c$ ,  $H_d$ ,  $H_e$ ,  $H_f$ ,  $H_g$  and  $H_h$ .
